# Supplementary material for: A new clinopyroxene thermobarometer for mafic to intermediate magmatic systems
Source: Copernicus journal article supplement (doi:10.5194/ejm-33-621-2021), 2021-10-15
Supplement: Supplementary file 1 [file ejm-33-621-2021-supplement.zip]

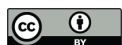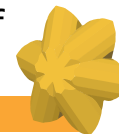

*Supplement of*

**A new clinopyroxene thermobarometer for mafic to intermediate magmatic systems**

**Xudong Wang et al.**

*Correspondence to:* Tong Hou (thou@cugb.edu.cn)

- ejm-33-621-2021-supplement-title-page.pdf
- Code S1.py
- Code S2.py
- Table S1.xlsx
- Table S2.xlsx
- Table S3.xlsx

The copyright of individual parts of the supplement might differ from the article licence.
